# Supplementary material for: Identification and Characterization of a Potential Antimicrobial Peptide Isolated from Soil Brevibacillus sp. WUL10 and Its Activity against MRSA Pathogens
Source: MDPI journal article supplement (doi:10.3390/tropicalmed7060093), 2022-06-07
Supplement: s1 [file s1]

# Supplementary Materials: Identification and Characterization of a Potential Antimicrobial Peptide Isolated from Soil *Brevibacillus* sp. WUL10 and Its Activity against MRSA Pathogens

Apichart Atipairin <sup>1,2</sup>, Nuttapon Songnaka <sup>1</sup>, Sucheewin Krobthong <sup>3</sup>, Yodying Yingchutrakul <sup>3,4</sup> and Thapanee Chinnawong <sup>1</sup> and Thamonwan Wanganuttara <sup>1,\*</sup>

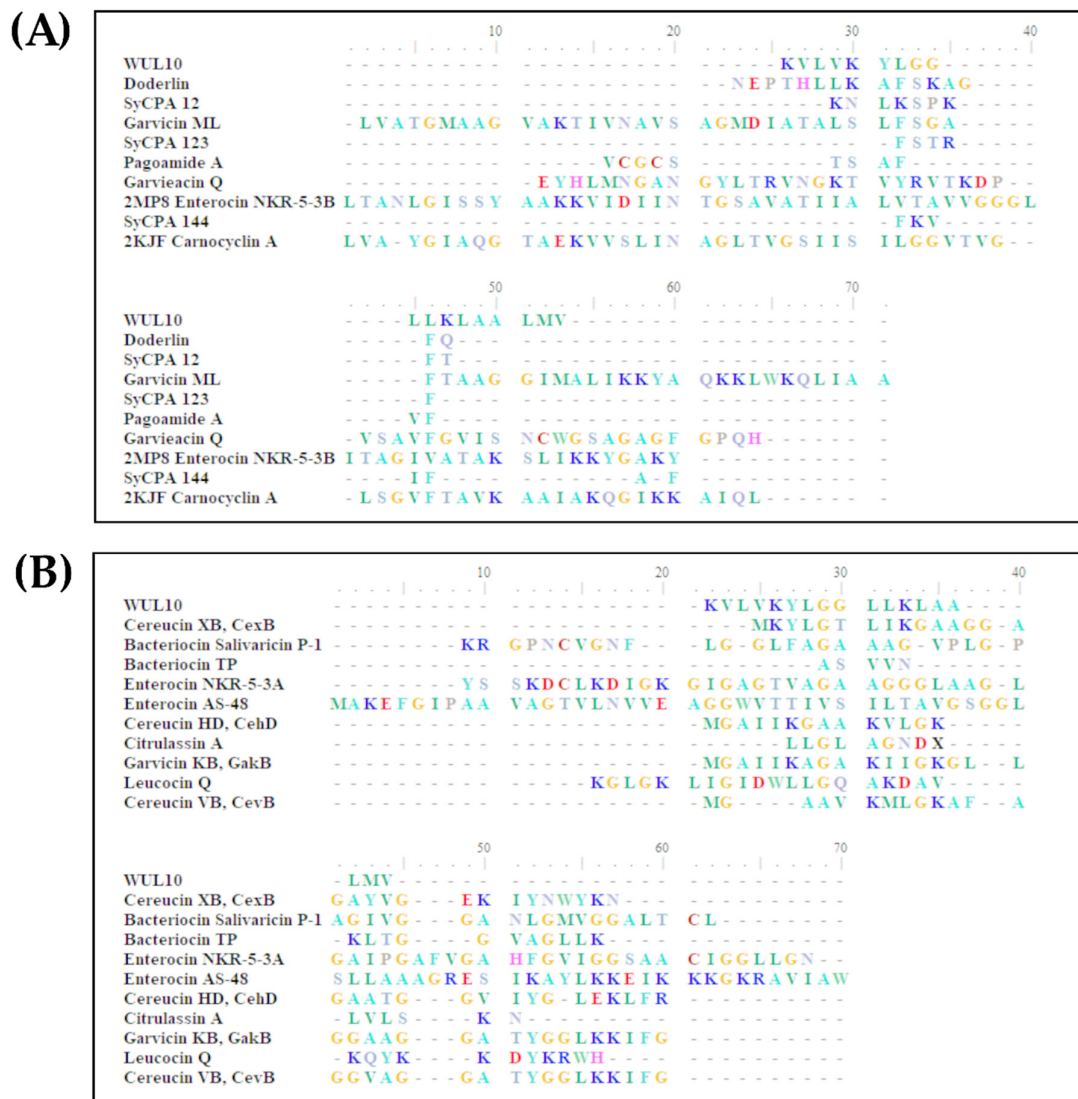

**Figure S1.** Multiple alignment analysis of WUL10 and other antimicrobial peptides using ClustalW. (A) APD3 Antimicrobial Peptide Database; 25 antimicrobial peptides (B) Database of Antimicrobial Activity and Structure of Peptides (DBAASP); 166 ribosomal peptides. These peptides were obtained from bacterial sources, and the first ten peptides that were similar to WUL10 were presented.

**Table S1.** Ion table after fragmentation of antimicrobial peptide by tandem MS to generate b and y ions.

| #  | b       | b-H2O   | b-NH3   | a       | c       | b (2+) | Seq | y       | y-H2O   | y-NH3   | z       | z'      | y (2+) | #  |
|----|---------|---------|---------|---------|---------|--------|-----|---------|---------|---------|---------|---------|--------|----|
| 1  | 129.10  | 111.09  | 112.08  | 101.11  | 146.13  | 65.05  | K   |         |         |         |         |         |        | 18 |
| 2  | 228.17  | 210.16  | 211.14  | 200.18  | 245.20  | 114.59 | V   | 1801.14 | 1783.13 | 1784.11 | 1784.11 | 1785.12 | 901.07 | 17 |
| 3  | 341.25  | 323.24  | 324.23  | 313.26  | 358.28  | 171.13 | L   | 1702.07 | 1684.06 | 1685.04 | 1685.04 | 1686.05 | 851.53 | 16 |
| 4  | 440.32  | 422.31  | 423.30  | 412.33  | 457.35  | 220.66 | V   | 1588.99 | 1570.98 | 1571.96 | 1571.96 | 1572.97 | 794.99 | 15 |
| 5  | 568.42  | 550.41  | 551.39  | 540.35  | 585.45  | 284.71 | K   | 1489.92 | 1471.91 | 1472.89 | 1472.89 | 1473.90 | 745.49 | 14 |
| 6  | 731.48  | 713.47  | 714.47  | 703.49  | 748.51  | 366.24 | Y   | 1361.82 | 1343.81 | 1344.80 | 1344.80 | 1345.80 | 681.50 | 13 |
| 7  | 844.56  | 826.55  | 827.55  | 816.57  | 861.57  | 422.78 | L   | 1198.82 | 1180.75 | 1181.73 | 1181.73 | 1182.74 | 599.88 | 12 |
| 8  | 901.59  | 883.58  | 884.56  | 873.59  | 918.61  | 451.29 | G   | 1085.74 | 1067.66 | 1068.65 | 1068.65 | 1069.66 | 543.34 | 11 |
| 9  | 958.65  | 940.64  | 941.64  | 930.66  | 975.64  | 479.80 | G   | 1028.72 | 1010.64 | 1011.63 | 1011.63 | 1012.63 | 514.83 | 10 |
| 10 | 1071.73 | 1053.71 | 1054.67 | 1043.74 | 1088.72 | 536.35 | L   | 971.66  | 953.62  | 954.61  | 954.61  | 955.61  | 486.31 | 9  |
| 11 | 1184.80 | 1166.77 | 1167.75 | 1156.82 | 1201.80 | 592.89 | L   | 858.58  | 840.54  | 841.52  | 841.52  | 842.53  | 429.77 | 8  |
| 12 | 1312.87 | 1294.86 | 1295.84 | 1284.88 | 1329.90 | 656.94 | K   | 745.49  | 727.48  | 728.44  | 728.44  | 729.44  | 373.23 | 7  |
| 13 | 1425.96 | 1407.95 | 1408.93 | 1397.96 | 1442.98 | 713.47 | L   | 617.40  | 599.36  | 600.34  | 600.34  | 601.35  | 309.23 | 6  |
| 14 | 1496.99 | 1478.98 | 1479.97 | 1469.00 | 1514.02 | 749.00 | A   | 504.32  | 486.31  | 487.26  | 487.26  | 488.27  | 252.64 | 5  |
| 15 | 1568.03 | 1550.02 | 1551.00 | 1540.04 | 1585.06 | 784.52 | A   | 433.24  | 415.24  | 416.22  | 416.22  | 417.23  | 217.19 | 4  |
| 16 | 1681.11 | 1663.10 | 1664.09 | 1653.12 | 1698.14 | 841.06 | L   | 362.24  | 344.20  | 345.18  | 345.18  | 346.19  | 181.61 | 3  |
| 17 | 1812.15 | 1794.14 | 1795.13 | 1784.16 | 1829.18 | 906.58 | M   | 249.16  | 231.12  | 232.10  | 232.10  | 233.11  | 125.06 | 2  |
| 18 |         |         |         |         |         |        | V   | 118.09  | 100.08  | 101.06  | 101.06  | 102.07  | 59.54  | 1  |
